# Supplementary material for: Diagnostic value of soluble Interleukin-2 receptor in patients suffering neurosarcoidosis: A systematic review
Source: PubMed Central journal article supplement — J Cent Nerv Syst Dis. 2024 Aug 26;16:11795735241274186. doi: 10.1177/11795735241274186 (PMC11348353; doi:10.1177/11795735241274186), 2024-08-26
Supplement: sj-pdf-1-cns-10.1177_11795735241274186.pdf [file sj-pdf-1-cns-10.1177_11795735241274186.pdf]

# **Diagnostic Value Of Soluble Interleukin-2 Receptor In Patients Suffering Neurosarcoidosis: A Systematic Review**

## **Search Terms**

### **PubMed:**

#### Search-term:

("soluble il 2 receptor"[Title/Abstract] OR "soluble interleukin 2 receptor"[Title/Abstract] OR "sIL-2R" OR "sIL2R" OR "sIL-2"[Title/Abstract] OR "IL-2R" OR "IL2R" OR "sIL2R")) AND Neurosarcoidosis [Title/Abstract]

### **The Web of Science:**

#### Search-term:

(TI=(Neurosarcoidosis) OR AB=(Neurosarcoidosis)) AND ((TI=(soluble interleukin 2 receptor) OR AB=(soluble interleukin-2 receptor) OR TI=(soluble il 2 receptor) OR AB=(soluble il 2 receptor) OR TI=(il 2 receptor) OR AB=(il 2 receptor) OR TI=(sIL2) OR AB=(sIL2R) OR TI=(sIL-2R) OR AB=(sIL-2R) OR TI=(sIL-2) OR AB=(sIL-2)))

### **Google Scholar:**

#### Search-term:

"neurosarcoidosis" and ("soluble interleukin 2 receptor" or "soluble IL-2 receptor")

### **Embase:**

#### Search-term:

(neurosarcoidosis and (soluble il 2 receptor or soluble interleukin 2 receptor or IL-2R or IL2R or sIL2R)).ab,ti.

### **Cochrane library:**

Date Run: 08/01/2024 05:35:20

ID Search Hits

#1 Neurosarcoidosis 13

| Author           | Study Year | Selecti on 1 | Selecti on 2 | Selecti on 3 | Selecti on 4 | Compara bility | Exposure Outcome 1 | Exposure Outcome 2 | Exposure Outcome 3 | Tot al | Study quality |
|------------------|------------|--------------|--------------|--------------|--------------|----------------|--------------------|--------------------|--------------------|--------|---------------|
| Sumi et al.      | 2003       | *            | *            | *            | -            | *              | *                  | *                  | -                  | 6      | 2             |
| Eurelings et al. | 2019       | *            | -            | *            | -            | -              | *                  | *                  | -                  | 4      | 2             |
| Petereit et al.  | 2020       | *            | -            | -            | -            | -              | *                  | *                  | *                  | 4      | 2             |
| Otto et al.      | 2020       | *            | -            | *            | -            | -              | *                  | *                  | *                  | 5      | 2             |
| Fujisawa et al.  | 2022       | -            | -            | *            | -            | -              | *                  | *                  | *                  | 4      | 2             |
| Vlad et al.      | 2023       | *            | -            | *            | -            | -              | *                  | *                  | -                  | 4      | 2             |

Table S1 Risk of Bias Assessment, Newcastle - Ottawa Quality Assessment Scale
